# Supplementary material for: Evaluation of a strategy for enrolling the families of critically ill patients in research using limited human resources
Source: PubMed Central journal article supplement (PMC5444627; doi:10.1371/journal.pone.0177741), 2017-05-25
Supplement: pone.0177741.s002.pdf [file pone.0177741.s002.pdf]

# PAB-Pilot Form 2: Family Interview

**Instructions:** Circle all “yes” or “no” answers. Only speak aloud the text in yellow boxes.

Subject ID - 1: \_\_\_\_\_  
 Data collector initials: \_\_\_\_\_  
 Date: \_\_\_\_\_

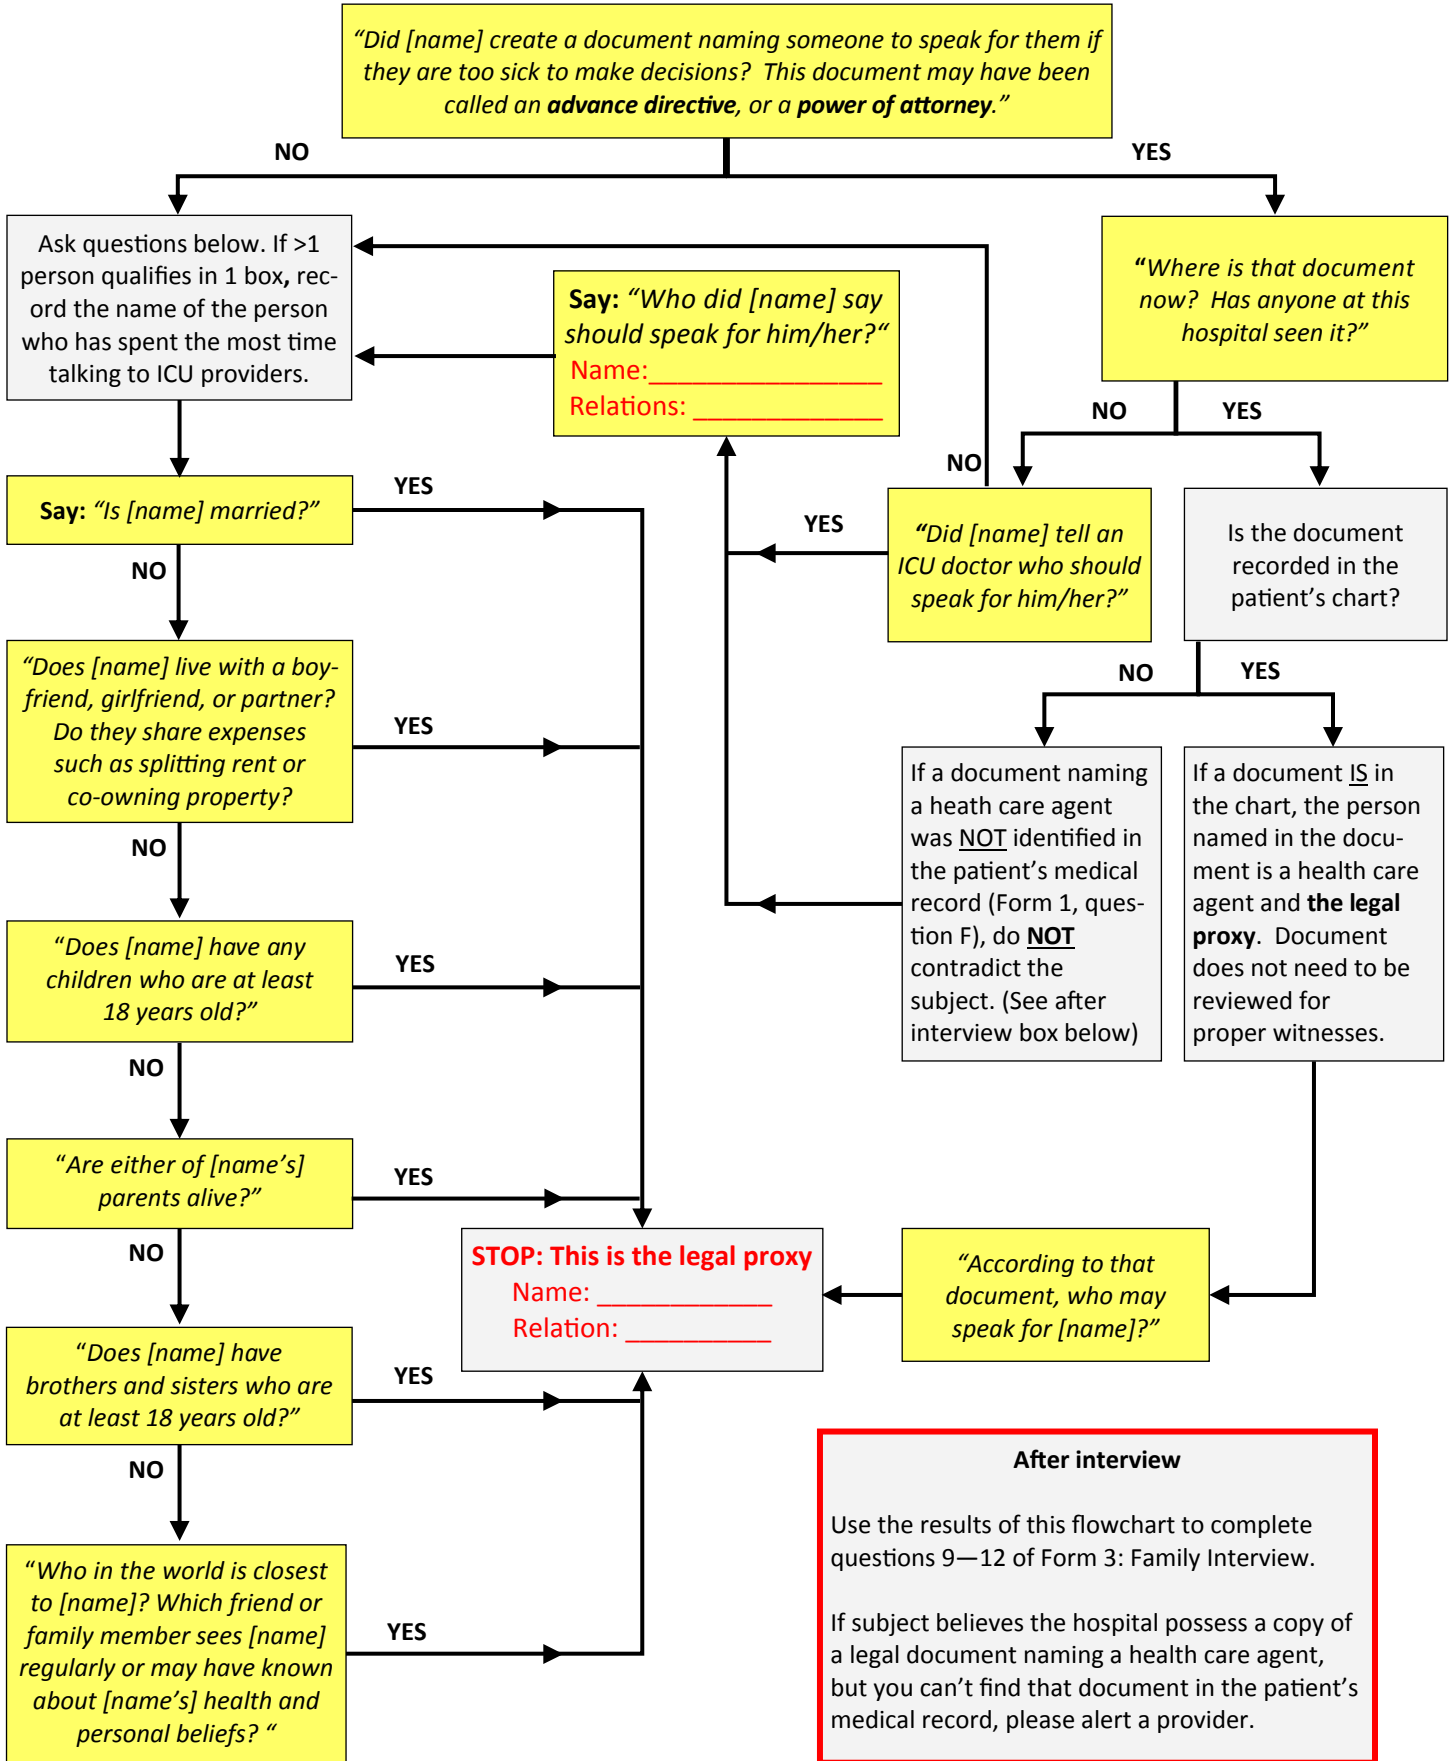

This algorithm was designed for use in the PAB-pilot study (IRB\_00080137). Hospitalized prisoners and wards of the state are not eligible to participate in this study and thus do not appear in the algorithm.
